# Supplementary material for: Single-Cell RNA Sequencing-Based Computational Analysis to Describe Disease Heterogeneity
Source: Front Genet. 2019 Jul 12;10:629. doi: 10.3389/fgene.2019.00629 (PMC6640157; doi:10.3389/fgene.2019.00629)
Supplement: Supp 2 — Feature genes of four human pancreas scRNA-seq datasets. [file Table_2.xlsx]

## Sheet: Sheet1
GSE86469	GSE81547	GSE81608	GSE83139
GCG	GCG	INS	GCG
INS	TTR	GCG	TTR
TM4SF4	SCG5	IAPP	SPP1
SERPINA1	PRSS1	TM4SF4	SERPINA3
G6PC2	REG1A	PPY	INS-IGF2
HADH	CPB1	SERPINA1	INS
PFKFB2	CPA1	GC	XIST
IAPP	GC	LOC100128906	SOX4
TTR	CHGB	MT1X	REG1A
GC	PNLIP	SST	TM4SF4
XIST	SERPINA1	G6PC2	G6PC2
CD44	CELA3A	MT2A	CHGB
GPX3	INS	HADH	SLC30A8
SOX4	CHGA	RPS4Y1	SERPINA1
RBP4	SERPINA3	FXYD2	IAPP
PCSK1	TM4SF1	RBP4	CD44
RGS4	GP2	SAT1	TSIX
TMEM176B	CPA2	FAP	IFITM3
DDAH1	CTRB2	FXYD5	SCG2
FAP	SCG2	PCP4	SCG5
ADCYAP1	CD44	ID2	RGS4
PDK4	CTRC	RGS2	SCGN
EFNA5	REG1B	DDIT3	GC
ANO5	TM4SF4	LDHA	LCN2
LDHA	TACSTD2	FABP5	PCSK2
C10orf10	SLC30A8	PDK4	CFB
PAPPA2	CPE	PFKFB2	GPX3
ANXA2	CTRB1	NPY	ENPP2
LOXL4	PCSK2	SMIM24	MMP7
TXLNA	CRYBA2	ARRDC3	PFKFB2
RPS4Y1	GPX3	TMEM208	NFIB
EDEM1	CLPS	GPX3	TM4SF1
PRUNE2	CD24	DEPP1	PDK4
RRAGD	SPINK1	CDKN1C	TSPAN7
BTG2	CELA3B	IFI30	FAP
HEPACAM2	PLA2G1B	CRYBA2	PAX6
BMP5	PDK4	UCHL1	C3
PPM1H	TRY6	MT1F	SCG3
SPP1	PTPRN	COMMD3	PRSS1
PLK2	SLC7A8	SCGB2A1	DDAH1
RGS2	SCGN	TMEM60	PCSK1
CPNE8	ENPP2	RELL1	TFPI
BAG4	QPCT	ANXA2	PIGR
CD99L2	SCG3	NUDT19	SPINK1
SLC39A11	GATM	DLK1	HADH
RP11-770J1.5	LDHA	RGS4	CD24
ABCC8	PAM	MRPL27	NEUROD1
FICD	ANXA4	PSME2	ANXA4
PARP9	ABCC8	VPS25	EFNA5
LDHB	PRSS3	PON2	FGF12

## Sheet: Sheet2
ENSG00000237851
ENSG00000257527
ENSG00000225193
ENSG00000254681
ENSG00000272370
ENSG00000159733
ENSG00000220785
ENSG00000034063
ENSG00000140575
ENSG00000254673
ENSG00000106992
ENSG00000167074
ENSG00000143479
ENSG00000223861
ENSG00000119514
ENSG00000236056
ENSG00000108510
ENSG00000234602
ENSG00000206052
ENSG00000261118
ENSG00000085832
ENSG00000237152
ENSG00000251569
ENSG00000121690
ENSG00000081842
ENSG00000259813
ENSG00000251629
ENSG00000149781
ENSG00000039560
ENSG00000162032
ENSG00000111775
ENSG00000101745
ENSG00000167881
ENSG00000169957
ENSG00000270689
ENSG00000248787
ENSG00000259318
ENSG00000135709
ENSG00000244306
ENSG00000243081
ENSG00000260804
ENSG00000197372
ENSG00000181555
ENSG00000214940
ENSG00000254618
ENSG00000137312
ENSG00000139579
ENSG00000105677
ENSG00000172071
ENSG00000238164
ENSG00000176148
ENSG00000200278
ENSG00000187741
ENSG00000178096
ENSG00000138686
ENSG00000188636
ENSG00000172613
ENSG00000233476
ENSG00000270113
ENSG00000256066
ENSG00000197779
ENSG00000264546
ENSG00000257359
ENSG00000115414
ENSG00000099991
ENSG00000229628
ENSG00000198923
ENSG00000128274
ENSG00000135686
ENSG00000240405
ENSG00000233871
ENSG00000144867
ENSG00000128805
ENSG00000053770
ENSG00000120913
ENSG00000231888
ENSG00000269131
ENSG00000213976
ENSG00000205212
ENSG00000250102
ENSG00000129270
ENSG00000179091
ENSG00000142546
ENSG00000109171
ENSG00000221869
ENSG00000179988
ENSG00000120306
ENSG00000152022
ENSG00000273155
ENSG00000228779
ENSG00000234806
ENSG00000227950
ENSG00000143933
ENSG00000187140
ENSG00000138771
ENSG00000196933
ENSG00000179163
ENSG00000236714
ENSG00000270255
ENSG00000109189
ENSG00000224982
ENSG00000257270
ENSG00000198901
ENSG00000025770
ENSG00000040633
ENSG00000117222
ENSG00000164715
ENSG00000260257
ENSG00000091490
ENSG00000258016
ENSG00000254064
ENSG00000257831
ENSG00000165416
ENSG00000123636
ENSG00000253900
ENSG00000166396
ENSG00000263986
ENSG00000178773
ENSG00000196826
ENSG00000240288
ENSG00000092036
ENSG00000227060
ENSG00000078725
ENSG00000184551
ENSG00000252531
ENSG00000127554
ENSG00000202198
ENSG00000185630
ENSG00000205643
ENSG00000267504
ENSG00000254685
ENSG00000213809
ENSG00000224786
ENSG00000101158
ENSG00000023697
ENSG00000247315
ENSG00000137841
ENSG00000133818
ENSG00000245748
ENSG00000106976
ENSG00000261783
ENSG00000269894
ENSG00000213411
ENSG00000230797
ENSG00000229800
ENSG00000161328
ENSG00000118849
ENSG00000258116
ENSG00000264196
ENSG00000117143
ENSG00000205534
ENSG00000075407
ENSG00000137486
ENSG00000100221
ENSG00000196275
ENSG00000225726
ENSG00000174405
ENSG00000101150
ENSG00000109943
ENSG00000140832
ENSG00000102401
ENSG00000086827
ENSG00000259402
ENSG00000146151
ENSG00000130770
ENSG00000258448
ENSG00000258886
ENSG00000186603
ENSG00000232352
ENSG00000107643
ENSG00000267283
ENSG00000112531
ENSG00000261537
ENSG00000168122
ENSG00000153046
ENSG00000095906
ENSG00000214919
ENSG00000173557
ENSG00000119487
ENSG00000083099
ENSG00000165650
ENSG00000211662
ENSG00000260583
ENSG00000176834
ENSG00000226240
ENSG00000214021
ENSG00000229256
ENSG00000108641
ENSG00000232750
ENSG00000185990
ENSG00000065268
ENSG00000237273
ENSG00000167258
ENSG00000260274
ENSG00000174307
ENSG00000172339
ENSG00000270523
ENSG00000154429
ENSG00000204387
ENSG00000114859
ENSG00000237842
ENSG00000225703
ENSG00000078900
ENSG00000244378
ENSG00000180190
ENSG00000236383
ENSG00000165795
ENSG00000103510
ENSG00000042781
ENSG00000059691
ENSG00000123200
ENSG00000176222
ENSG00000102081
ENSG00000196220
ENSG00000163513
ENSG00000229083
ENSG00000228716
ENSG00000196584
ENSG00000065883
ENSG00000129472
ENSG00000184584
ENSG00000122512
ENSG00000196739
ENSG00000163655
ENSG00000253500
ENSG00000184056
ENSG00000235958
ENSG00000087494
ENSG00000231500
ENSG00000249593
ENSG00000136811
ENSG00000167264
ENSG00000213516
ENSG00000181577
ENSG00000120837
ENSG00000087995
ENSG00000140015
ENSG00000172318
ENSG00000270381
ENSG00000084112
ENSG00000230470
ENSG00000137628
ENSG00000261052
ENSG00000163138
ENSG00000120262
ENSG00000166888
ENSG00000151338
ENSG00000223496
ENSG00000153246
ENSG00000134996
ENSG00000155508
ENSG00000129474
ENSG00000267254
ENSG00000141294
ENSG00000229344
ENSG00000102158
ENSG00000229014
ENSG00000245213
ENSG00000160321
ENSG00000033030
ENSG00000237489
ENSG00000232320
ENSG00000134744
ENSG00000156515
ENSG00000234136
ENSG00000167377
ENSG00000143742
ENSG00000228858
ENSG00000235356
ENSG00000254226
ENSG00000254893
ENSG00000270681
ENSG00000256050
ENSG00000172403
ENSG00000115687
ENSG00000198912
ENSG00000134627
ENSG00000150773
ENSG00000272335
ENSG00000162642
ENSG00000131437
ENSG00000163909
ENSG00000269974
ENSG00000178764
ENSG00000164920
ENSG00000227910
ENSG00000131002
ENSG00000204228
ENSG00000240108
ENSG00000243099
ENSG00000159023
ENSG00000197870
ENSG00000163932
ENSG00000107821
ENSG00000211958
ENSG00000141441
ENSG00000137802
ENSG00000107175
ENSG00000256294
ENSG00000241219
ENSG00000151838
ENSG00000224882
ENSG00000023318
ENSG00000156398
ENSG00000235398
ENSG00000217128
ENSG00000124243
ENSG00000212643
ENSG00000135900
ENSG00000197471
ENSG00000184886
ENSG00000233741
ENSG00000254481
ENSG00000272434
ENSG00000249395
ENSG00000259985
ENSG00000183675
ENSG00000111727
ENSG00000135974
ENSG00000164306
ENSG00000250325
ENSG00000230534
ENSG00000213886
ENSG00000143545
ENSG00000267980
ENSG00000229023
ENSG00000224236
ENSG00000063587
ENSG00000244055
ENSG00000179818
ENSG00000261172
ENSG00000204793
ENSG00000106348
ENSG00000261553
ENSG00000145391
ENSG00000120555
ENSG00000224733
ENSG00000268861
ENSG00000167969
ENSG00000262714
ENSG00000249855
ENSG00000172432
ENSG00000137825
ENSG00000079150
ENSG00000214760
ENSG00000117114
ENSG00000111254
ENSG00000070785
ENSG00000197933
ENSG00000198406
ENSG00000106086
ENSG00000152377
ENSG00000141756
ENSG00000251093
ENSG00000261589
ENSG00000270223
ENSG00000233340
ENSG00000268088
ENSG00000239969
ENSG00000183117
ENSG00000163945
ENSG00000261130
ENSG00000269175
ENSG00000118402
ENSG00000078142
ENSG00000138744
ENSG00000236761
ENSG00000223711
ENSG00000165732
ENSG00000234624
ENSG00000250068
ENSG00000102103
ENSG00000182484
ENSG00000150551
ENSG00000243650
ENSG00000185591
ENSG00000198382
ENSG00000229186
ENSG00000188211
ENSG00000231999
ENSG00000164163
ENSG00000249797
ENSG00000130304
ENSG00000225200
ENSG00000213066
ENSG00000145740
ENSG00000254013
ENSG00000110717
ENSG00000228327
ENSG00000166143
ENSG00000147905
ENSG00000090932
ENSG00000104881
ENSG00000269397
ENSG00000162104
ENSG00000228140
ENSG00000248873
ENSG00000239257
ENSG00000003756
ENSG00000173013
ENSG00000121848
ENSG00000248323
ENSG00000180574
ENSG00000118407
ENSG00000165283
ENSG00000131475
ENSG00000006625
ENSG00000175898
ENSG00000227646
ENSG00000255326
ENSG00000048028
ENSG00000089022
ENSG00000168779
ENSG00000203950
ENSG00000126351
ENSG00000213830
ENSG00000151846
ENSG00000231365
ENSG00000168631
ENSG00000272667
ENSG00000254495
ENSG00000154124
ENSG00000069966
ENSG00000267776
ENSG00000171657
ENSG00000232938
ENSG00000259939
ENSG00000148803
ENSG00000219433
ENSG00000273345
ENSG00000065150
ENSG00000177125
ENSG00000204219
ENSG00000242687
ENSG00000236719
ENSG00000198477
ENSG00000081803
ENSG00000160194
ENSG00000259611
ENSG00000259976
ENSG00000229314
ENSG00000218418
ENSG00000250561
ENSG00000153815
ENSG00000171953
ENSG00000028116
ENSG00000162928
ENSG00000231646
ENSG00000171425
ENSG00000201558
ENSG00000214967
ENSG00000258490
ENSG00000217648
ENSG00000168575
ENSG00000172732
ENSG00000154122
ENSG00000226245
ENSG00000171574
ENSG00000242860
ENSG00000187736
ENSG00000178826
ENSG00000263293
ENSG00000116604
ENSG00000198513
ENSG00000118705
ENSG00000100968
ENSG00000146670
ENSG00000187944
ENSG00000076321
ENSG00000065485
ENSG00000247774
ENSG00000219392
ENSG00000267547
ENSG00000267309
ENSG00000147234
ENSG00000154743
ENSG00000130244
ENSG00000197061
ENSG00000182118
ENSG00000029993
ENSG00000166033
ENSG00000106615
ENSG00000167840
ENSG00000110675
ENSG00000261962
ENSG00000142583
ENSG00000132000
ENSG00000105722
ENSG00000267222
ENSG00000241229
ENSG00000272990
ENSG00000234694
ENSG00000204839
ENSG00000162434
ENSG00000225171
ENSG00000231307
ENSG00000228404
ENSG00000231965
ENSG00000185246
ENSG00000167699
ENSG00000237970
ENSG00000141469
ENSG00000154813
ENSG00000172159
ENSG00000232368
ENSG00000100147
ENSG00000225945
ENSG00000088543
ENSG00000206910
ENSG00000167182
ENSG00000230383
ENSG00000264364
ENSG00000184194
ENSG00000167637
ENSG00000130396
ENSG00000108384
ENSG00000242087
ENSG00000172602
ENSG00000126947
ENSG00000224892
ENSG00000092931
ENSG00000175544
ENSG00000020256
ENSG00000174599
ENSG00000198399
ENSG00000109680
ENSG00000224722
ENSG00000144908
ENSG00000138613
ENSG00000236312
ENSG00000145002
ENSG00000272076
ENSG00000226963
ENSG00000224426
ENSG00000239396
ENSG00000035928
ENSG00000227309
ENSG00000161970
ENSG00000257588
ENSG00000167740
ENSG00000109790
ENSG00000229950
ENSG00000058091
ENSG00000203279
ENSG00000086300
ENSG00000150760
ENSG00000216285
ENSG00000261158
ENSG00000158470
ENSG00000185130
ENSG00000112462
ENSG00000197857
ENSG00000183655
ENSG00000136536
ENSG00000002330
ENSG00000272181
ENSG00000229464
ENSG00000148483
ENSG00000243749
ENSG00000085552
ENSG00000082497
ENSG00000272630
ENSG00000143207
ENSG00000153037
ENSG00000259038
ENSG00000164125
ENSG00000225508
ENSG00000102349
ENSG00000231327
ENSG00000163347
ENSG00000119714
ENSG00000212670
ENSG00000211648
ENSG00000176383
ENSG00000106823
ENSG00000240589
ENSG00000269604
ENSG00000107021
ENSG00000226958
ENSG00000244300
ENSG00000238168
ENSG00000122741
ENSG00000237276
ENSG00000135976
ENSG00000105486
ENSG00000112624
ENSG00000165948
ENSG00000243414
ENSG00000063601
ENSG00000165195
ENSG00000132676
ENSG00000160326
ENSG00000085274
ENSG00000151136
ENSG00000077684
ENSG00000223804
ENSG00000141580
ENSG00000113583
ENSG00000066405
ENSG00000136830
ENSG00000234678
ENSG00000173818
ENSG00000057657
ENSG00000113758
ENSG00000257985
ENSG00000260054
ENSG00000237343
ENSG00000171608
ENSG00000142327
ENSG00000169372
ENSG00000186832
ENSG00000170348
ENSG00000048392
ENSG00000166455
ENSG00000229659
ENSG00000183779
ENSG00000254985
ENSG00000235411
ENSG00000218426
ENSG00000182022
ENSG00000120899
ENSG00000242384
ENSG00000272758
ENSG00000271529
ENSG00000162572
ENSG00000090054
ENSG00000232629
ENSG00000261093
ENSG00000204922
ENSG00000267383
ENSG00000198168
ENSG00000116205
ENSG00000162337
ENSG00000072952
ENSG00000152778
ENSG00000140263
ENSG00000229642
ENSG00000214145
ENSG00000197128
ENSG00000151726
ENSG00000213967
ENSG00000172667
ENSG00000206418
ENSG00000111897
ENSG00000104205
ENSG00000171428
ENSG00000127081
ENSG00000115866
ENSG00000164597
ENSG00000236229
ENSG00000186056
ENSG00000196152
ENSG00000125844
ENSG00000160117
ENSG00000265912
ENSG00000176236
ENSG00000232806
ENSG00000168491
ENSG00000261011
ENSG00000239426
ENSG00000105696
ENSG00000266283
ENSG00000104756
ENSG00000154874
ENSG00000163694
ENSG00000138161
ENSG00000172819
ENSG00000111859
ENSG00000271997
ENSG00000109667
ENSG00000228437
ENSG00000223779
ENSG00000182712
ENSG00000126070
ENSG00000262003
ENSG00000146463
ENSG00000106780
ENSG00000083814
ENSG00000107968
ENSG00000147183
ENSG00000179820
ENSG00000137331
ENSG00000234420
ENSG00000172818
ENSG00000101138
ENSG00000165244
ENSG00000113916
ENSG00000240682
ENSG00000227383
ENSG00000162521
ENSG00000238247
ENSG00000100949
ENSG00000213859
ENSG00000197548
ENSG00000157601
ENSG00000146373
ENSG00000240342
ENSG00000172081
ENSG00000228205
ENSG00000186710
ENSG00000260672
ENSG00000107625
ENSG00000134775
ENSG00000128585
ENSG00000106688
ENSG00000227825
ENSG00000261243
ENSG00000089094
ENSG00000108961
ENSG00000198856
ENSG00000234287
ENSG00000168137
ENSG00000067560
ENSG00000109756
ENSG00000165935
ENSG00000075624
ENSG00000240216
ENSG00000077092
ENSG00000183598
ENSG00000116903
ENSG00000180998
ENSG00000109927
ENSG00000139116
ENSG00000228801
ENSG00000186517
ENSG00000106689
ENSG00000151917
ENSG00000155792
ENSG00000230146
ENSG00000249996
ENSG00000256249
ENSG00000204650
ENSG00000162496
ENSG00000105426
ENSG00000118976
ENSG00000229833
ENSG00000106105
ENSG00000197746
ENSG00000155657
ENSG00000092978
ENSG00000204344
ENSG00000095932
ENSG00000267606
ENSG00000162639
ENSG00000254783
ENSG00000147789
ENSG00000154760
ENSG00000186280
ENSGR0000197976
ENSG00000123836
ENSG00000008988
ENSG00000009844
ENSG00000182742
ENSG00000138073
ENSG00000259429
ENSG00000233084
ENSG00000134686
ENSG00000174917
ENSG00000198804
ENSG00000121211
ENSG00000171136
ENSG00000196781
ENSG00000270165
ENSG00000253607
ENSG00000255103
ENSG00000160145
ENSG00000221990
ENSG00000237522
ENSG00000266783
ENSG00000233224
ENSG00000163468
ENSG00000257365
ENSG00000140323
ENSG00000226948
ENSG00000198515
ENSG00000152409
ENSG00000202496
ENSG00000149483
ENSG00000115947
ENSG00000178458
ENSG00000083290
ENSG00000224550
ENSG00000264058
ENSG00000243150
ENSG00000175564
ENSG00000246985
ENSG00000228007
ENSG00000226017
ENSG00000172586
ENSG00000184486
ENSG00000163354
ENSG00000248275
ENSG00000270367
ENSG00000240674
ENSG00000246582
ENSG00000237689
ENSG00000158234
ENSG00000075461
ENSG00000205356
ENSG00000047849
ENSG00000268714
ENSG00000204055
ENSG00000165895
ENSG00000244313
ENSG00000066923
ENSG00000165752
ENSG00000198060
ENSG00000130988
ENSG00000163563
ENSG00000258424
ENSG00000267322
ENSG00000159224
ENSG00000170638
ENSG00000179743
ENSG00000170004
ENSG00000180458
ENSG00000272523
ENSG00000135776
ENSG00000101940
ENSG00000160917
ENSG00000175899
ENSG00000156860
ENSG00000128564
ENSG00000125351
ENSG00000175137
ENSG00000157388
ENSG00000159173
ENSG00000163013
ENSG00000155330
ENSG00000233509
ENSG00000267457
ENSG00000143622
ENSG00000090316
ENSG00000260643
ENSG00000179841
ENSG00000260641
ENSG00000178234
ENSG00000198744
ENSG00000230191
ENSG00000229567
ENSG00000163110
ENSG00000181481
ENSG00000128594
ENSG00000227262
ENSG00000120942
ENSG00000261872
ENSG00000113296
ENSG00000008735
ENSG00000240618
ENSG00000177352
ENSG00000172900
ENSG00000243297
ENSG00000261079
ENSG00000070018
ENSG00000262791
ENSG00000198153
ENSG00000254876
ENSG00000144668
ENSG00000048740
ENSG00000226419
ENSG00000135912
ENSG00000111642
ENSG00000138385
ENSG00000225195
ENSG00000224046
ENSG00000169230
ENSG00000105988
ENSG00000130783
ENSG00000101335
ENSG00000227234
ENSG00000131187
ENSG00000227124
ENSG00000110218
ENSG00000152253
ENSG00000233885
ENSG00000183735
ENSG00000261779
ENSG00000226982
ENSG00000228262
ENSG00000112667
ENSG00000238039
ENSG00000128815
ENSG00000198028
ENSG00000170482
ENSG00000171658
ENSG00000145216
ENSG00000241553
ENSG00000131778
ENSG00000260219
ENSG00000164825
ENSG00000145242
ENSG00000221955
ENSG00000119185
ENSG00000171723
ENSG00000109536
ENSG00000224631
ENSG00000001497
ENSG00000117036
ENSG00000273240
ENSG00000165916
ENSG00000177628
ENSG00000177830
ENSG00000167889
ENSG00000100647
ENSG00000134057
ENSG00000184840
ENSG00000259096
ENSG00000258479
ENSG00000229721
ENSG00000179144
ENSG00000143512
ENSG00000245156
ENSG00000121904
ENSG00000257243
ENSG00000115977
ENSG00000227218
ENSG00000082153
ENSG00000229931
ENSG00000065970
ENSG00000242085
ENSG00000226880
ENSG00000188822
ENSG00000070808
ENSG00000237021
ENSG00000260936
ENSG00000163331
ENSG00000107960
ENSG00000119392
ENSG00000115239
ENSG00000124275
ENSG00000103035
ENSG00000185238
ENSG00000213999
ENSG00000090470
ENSG00000155282
ENSG00000147251
ENSG00000128617
ENSG00000083454
ENSG00000258768
ENSG00000233589
ENSG00000188895
ENSG00000267270
ENSG00000164828
ENSG00000183495
ENSG00000174776
ENSG00000242318
ENSG00000128266
ENSG00000261341
ENSG00000269946
ENSG00000101400
ENSG00000117280
ENSG00000165572
ENSG00000234531
ENSG00000115762
ENSG00000227063
ENSG00000132182
ENSG00000259357
ENSG00000260869
ENSG00000139263
ENSG00000023191
ENSG00000158769
ENSG00000213860
ENSG00000122203
ENSG00000221986
ENSG00000170954
ENSG00000216522
ENSG00000229503
ENSG00000257702
ENSG00000196378
ENSG00000253368
ENSG00000137955
ENSG00000137944
ENSG00000229127
ENSG00000104343
ENSG00000257818
ENSG00000151923
ENSG00000173334
ENSG00000107331
ENSG00000267323
ENSG00000109814
ENSG00000260007
ENSG00000238269
ENSG00000230074
ENSG00000011258
ENSG00000170522
ENSG00000121064
ENSG00000249437
ENSG00000110700
ENSG00000198963
ENSG00000173171
ENSG00000214022
ENSG00000063177
ENSG00000144048
ENSG00000198286
ENSG00000165186
ENSG00000250541
ENSG00000254509
ENSG00000203930
ENSG00000231652
ENSG00000140853
ENSG00000153201
ENSG00000198799
ENSG00000227462
ENSG00000182180
ENSG00000116691
ENSG00000183486
ENSG00000132002
ENSG00000236035
ENSG00000079134
ENSG00000234705
ENSG00000213762
ENSG00000228060
ENSG00000197054
ENSG00000105997
ENSG00000261827
ENSG00000267512
ENSG00000120075
ENSG00000177640
ENSG00000250011
ENSG00000162063
ENSG00000075790
ENSG00000110446
ENSG00000151090
ENSG00000243609
ENSG00000102174
ENSG00000162636
ENSG00000180104
ENSG00000170085
ENSG00000196792
ENSG00000273373
ENSG00000261124
ENSG00000268066
ENSG00000181938
ENSG00000233406
ENSG00000114416
ENSG00000156709
ENSG00000248215
ENSG00000251593
ENSG00000196591
ENSG00000272949
ENSG00000073150
ENSG00000262020
ENSG00000213123
ENSG00000100413
ENSG00000232536
ENSG00000180992
ENSG00000149196
ENSG00000272048
ENSG00000136859
ENSG00000196233
ENSG00000165300
ENSG00000169429
ENSG00000121361
ENSG00000224769
ENSG00000178053
ENSG00000254122
ENSG00000165392
ENSG00000223356
ENSG00000100612
ENSG00000102921
ENSG00000225302
ENSG00000168461
ENSG00000120457
ENSG00000139173
ENSG00000177951
ENSG00000227709
ENSG00000097033
ENSG00000270170
ENSG00000105447
ENSG00000074855
ENSG00000223908
ENSG00000061987
ENSG00000177738
ENSG00000236200
ENSG00000124749
ENSG00000171227
ENSG00000205871
ENSG00000143457
ENSG00000234427
ENSG00000254112
ENSG00000269293
ENSG00000181826
ENSG00000139546
ENSG00000053524
ENSG00000137100
ENSG00000169306
ENSG00000261864
ENSG00000131142
ENSG00000164347
ENSG00000270175
ENSG00000123009
ENSG00000225447
ENSG00000163806
ENSG00000173933
ENSG00000273167
ENSG00000155719
ENSG00000091640
ENSG00000230508
ENSG00000110713
ENSG00000078814
ENSG00000270558
ENSG00000167522
ENSG00000182481
ENSG00000260686
ENSG00000234297
ENSG00000131724
ENSG00000248863
ENSG00000187049
ENSG00000172315
ENSG00000112769
ENSG00000254884
ENSG00000273259
ENSG00000224429
ENSG00000158125
ENSG00000244270
ENSG00000146826
ENSG00000234040
ENSG00000254978
ENSG00000255436
ENSG00000155827
ENSG00000154359
ENSG00000144635
ENSG00000267668
ENSG00000082196
ENSG00000233585
ENSG00000271043
ENSG00000125991
ENSG00000240527
ENSG00000196636
ENSG00000164010
ENSG00000152558
ENSG00000101596
ENSG00000176406
ENSG00000160050
ENSG00000159917
ENSG00000089234
ENSG00000196284
ENSG00000273151
ENSG00000226478
ENSG00000007202
ENSG00000260017
ENSG00000223705
ENSG00000164983
ENSG00000263776
ENSG00000254936
ENSG00000036672
ENSG00000179918
ENSG00000236698
ENSG00000085224
ENSG00000135124
ENSG00000163605
ENSG00000230042
ENSG00000181404
ENSG00000259918
ENSG00000213483
ENSG00000026103
ENSG00000230667
ENSG00000049247
ENSG00000229876
ENSG00000241255
ENSG00000086189
ENSG00000182004
ENSG00000241058
ENSG00000180425
ENSG00000184857
ENSG00000168813
ENSG00000168852
ENSG00000211456
ENSG00000198728
ENSG00000182208
ENSG00000119669
ENSG00000255275
ENSG00000140092
ENSG00000178502
ENSG00000235573
ENSG00000244073
ENSG00000255927
ENSG00000118939
ENSG00000114251
ENSG00000260725
ENSG00000185504
ENSG00000138741
ENSG00000171004
ENSG00000163818
ENSG00000189280
ENSG00000144182
ENSG00000027869
ENSG00000235670
ENSG00000160294
ENSG00000182185
ENSG00000086200
ENSG00000273143
ENSG00000240993
ENSG00000233541
ENSG00000258640
ENSG00000164778
ENSG00000050130
ENSG00000183066
ENSG00000265542
ENSG00000149761
ENSG00000144524
ENSG00000272645
ENSG00000117152
ENSG00000224546
ENSG00000241288
ENSG00000250329
ENSG00000273416
ENSG00000143924
ENSG00000169439
ENSG00000107611
ENSG00000271095
ENSG00000090382
ENSG00000203652
ENSG00000266876
ENSG00000138085
ENSG00000120733
ENSG00000270421
ENSG00000254429
ENSG00000005486
ENSG00000057608
ENSG00000185633
ENSG00000188315
ENSG00000234241
ENSG00000271948
ENSG00000169508
ENSG00000131375
ENSG00000260914
ENSG00000160256
ENSG00000243742
ENSG00000130222
ENSG00000166986
ENSG00000197121
ENSG00000245526
ENSG00000179912
ENSG00000120705
ENSGR0000168939
ENSG00000189180
ENSG00000269867
ENSG00000224629
ENSG00000128915
ENSG00000230777
ENSG00000080986
ENSG00000253910
ENSG00000189149
ENSG00000228686
ENSG00000234616
ENSG00000163739
ENSG00000269614
ENSG00000239374
ENSG00000162576
ENSG00000170577
ENSG00000242808
ENSG00000236197
ENSG00000065308
ENSG00000266088
ENSG00000093183
ENSG00000243004
ENSG00000255893
ENSG00000251281
ENSG00000124279
ENSG00000143674
ENSG00000188766
ENSG00000257553
ENSG00000251201
ENSG00000152402
ENSG00000076513
ENSG00000204361
ENSG00000217643
ENSG00000225914
ENSG00000165006
ENSG00000137875
ENSG00000260235
ENSG00000206142
ENSG00000100994
ENSG00000130052
ENSG00000165716
ENSG00000258655
ENSG00000159197
ENSG00000242299
ENSG00000127720
ENSG00000259556
ENSG00000253227
ENSG00000141086
ENSG00000253313
ENSG00000100314
ENSG00000126453
ENSG00000271699
ENSG00000068697
ENSG00000111581
ENSG00000241839
ENSG00000240902
ENSG00000240463
ENSG00000145725
ENSG00000107159
ENSG00000263203
ENSG00000226779
ENSG00000068745
ENSG00000218739
ENSG00000227765
ENSG00000022556
ENSG00000177030
ENSG00000262292
ENSG00000240891
ENSG00000270964
ENSG00000247934
ENSG00000235672
ENSG00000099256
ENSG00000118507
ENSG00000243175
ENSG00000150527
ENSG00000269599
ENSG00000168724
ENSG00000184454
ENSG00000187147
ENSG00000131381
ENSG00000226268
ENSG00000175061
ENSG00000160113
ENSG00000170802
ENSG00000226824
ENSG00000184867
ENSG00000176920
ENSG00000156140
ENSG00000111237
ENSG00000244676
ENSG00000127526
ENSG00000188807
ENSG00000251199
ENSG00000217060
ENSG00000061794
ENSG00000240183
ENSG00000118004
ENSG00000103852
ENSG00000267049
ENSG00000248223
ENSG00000196208
ENSG00000159363
ENSG00000109944
ENSG00000231294
ENSG00000273013
ENSG00000205542
ENSG00000233532
ENSG00000132356
ENSG00000129103
ENSG00000105855
ENSG00000249848
ENSG00000233522
ENSG00000144736
ENSG00000067704
ENSG00000126215
ENSG00000229415
ENSG00000106804
ENSG00000204611
ENSG00000166603
ENSG00000160282
ENSG00000254285
ENSG00000184545
ENSG00000149150
ENSG00000140332
ENSG00000075945
ENSG00000115221
ENSG00000162976
ENSG00000183044
ENSG00000155008
ENSG00000165240
ENSG00000101000
ENSG00000198431
ENSG00000271778
ENSG00000119681
ENSG00000139835
ENSG00000104671
ENSG00000168077
ENSG00000081721
ENSG00000260228
ENSG00000047936
ENSG00000103353
ENSG00000240230
ENSG00000172456
ENSG00000103199
ENSG00000230487
ENSG00000255329
ENSG00000234983
ENSG00000130997
ENSG00000163810
ENSG00000227325
ENSG00000179172
ENSG00000159377
ENSG00000064102
ENSG00000258038
ENSG00000170340
ENSG00000165124
ENSG00000130695
ENSG00000260955
ENSG00000256586
ENSG00000185800
ENSG00000260367
ENSG00000225858
ENSG00000204814
ENSG00000225216
ENSG00000250264
ENSG00000100209
ENSG00000272779
ENSG00000238273
ENSG00000227695
ENSG00000158079
ENSG00000138028
ENSG00000242951
ENSG00000264080
ENSG00000197757
ENSG00000205413
ENSG00000180357
ENSG00000240257
ENSG00000119778
ENSG00000259712
ENSG00000238098
ENSG00000008256
ENSG00000205334
ENSG00000198879
ENSG00000214465
ENSG00000270024
ENSG00000235944
ENSG00000160408
ENSG00000106034
ENSG00000205670
ENSG00000184922
ENSG00000260618
ENSG00000260774
ENSG00000247077
ENSG00000257222
ENSG00000139547
ENSG00000147459
ENSG00000214711
ENSG00000186868
ENSG00000272923
ENSG00000115966
ENSG00000134590
ENSG00000186310
ENSG00000255320
ENSG00000233605
ENSG00000163877
ENSG00000170445
ENSG00000166025
ENSG00000173614
ENSG00000112763
ENSG00000261135
ENSG00000173327
ENSG00000205184
ENSG00000100418
ENSG00000165507
ENSG00000261777
ENSG00000145246
ENSG00000143297
ENSG00000196963
ENSG00000183963
ENSG00000271430
ENSG00000187838
ENSG00000232949
ENSG00000269439
ENSG00000181027
ENSG00000219435
ENSG00000249207
ENSG00000267102
ENSG00000176227
ENSG00000235299
ENSG00000174197
ENSG00000165168
ENSG00000264933
ENSG00000177409
ENSG00000186076
ENSG00000248840
ENSG00000236255
ENSG00000170324
ENSG00000236558
ENSG00000159713
ENSG00000226011
ENSG00000117461
ENSG00000157965
ENSG00000143882
ENSG00000115274
ENSG00000232667
ENSG00000162231
ENSG00000188971
ENSG00000155313
ENSG00000170516
ENSG00000132825
ENSG00000141759
ENSG00000086289
ENSG00000265735
ENSG00000238287
ENSG00000133317
ENSG00000232284
ENSG00000197324
ENSG00000188522
ENSG00000083635
ENSG00000256546
ENSG00000100027
ENSG00000255835
ENSG00000229781
ENSG00000246705
ENSG00000076641
ENSG00000109881
ENSG00000143127
ENSG00000142798
ENSG00000260579
ENSG00000246662
ENSG00000143970
ENSG00000005156
ENSG00000120327
ENSG00000115839
ENSG00000156968
ENSG00000214562
ENSG00000254266
ENSG00000240294
ENSG00000173110
ENSG00000167113
ENSG00000227954
ENSG00000262967
ENSG00000164330
ENSG00000162650
ENSG00000259180
ENSG00000132383
ENSG00000066933
ENSG00000235378
ENSG00000110013
ENSG00000143450
ENSG00000047662
ENSG00000121060
ENSG00000255449
ENSG00000153898
ENSG00000166401
ENSG00000155961
ENSG00000135679
ENSG00000144118
ENSG00000235912
ENSG00000273173
ENSG00000143889
ENSG00000230561
ENSG00000174227
ENSG00000136059
ENSG00000204531
ENSG00000258608
ENSG00000151304
ENSG00000213190
ENSG00000186187
ENSG00000165215
ENSG00000101187
ENSG00000243000
ENSG00000203999
ENSG00000242657
ENSG00000176533
ENSG00000225733
ENSG00000204645
ENSG00000246695
ENSG00000122970
ENSG00000150712
ENSG00000125741
ENSG00000267882
ENSG00000258603
ENSG00000272986
ENSG00000242028
ENSG00000148303
ENSG00000102309
ENSG00000126870
ENSG00000199477
ENSG00000170632
ENSG00000267796
ENSG00000229391
ENSG00000151665
ENSG00000240087
ENSG00000100151
ENSG00000267356
ENSG00000235559
ENSG00000170231
ENSG00000266397
ENSG00000241959
ENSG00000259065
ENSG00000250033
ENSG00000183691
ENSG00000078804
ENSG00000260123
ENSG00000166770
ENSG00000214770
ENSG00000271049
ENSG00000183298
ENSG00000228278
ENSG00000254288
ENSG00000271533
ENSG00000231721
ENSG00000099364
ENSG00000262848
ENSG00000137124
ENSG00000178694
ENSG00000086065
ENSG00000101413
ENSG00000218996
ENSG00000255641
ENSG00000106025
ENSG00000196549
ENSG00000129696
ENSG00000212664
ENSG00000119929
ENSG00000269891
ENSG00000164904
ENSG00000233351
ENSG00000266385
ENSG00000231050
ENSG00000151116
ENSG00000240861
ENSG00000095066
ENSG00000266450
ENSG00000236679
ENSG00000166501
ENSG00000184903
ENSG00000272173
ENSG00000136999
ENSG00000120756
ENSG00000174669
ENSG00000104613
ENSG00000087263
ENSG00000255154
ENSG00000163993
ENSG00000157637
ENSG00000082014
ENSG00000204084
ENSG00000252690
ENSG00000104381
ENSG00000245849
ENSG00000060237
ENSG00000175911
ENSG00000162959
ENSG00000086548
ENSG00000235448
ENSG00000130703
ENSG00000204308
ENSG00000242256
ENSG00000230701
ENSG00000112167
ENSG00000239462
ENSG00000230056
ENSG00000135924
ENSG00000042493
ENSG00000118260
ENSG00000176155
ENSG00000249476
ENSG00000250322
ENSG00000254130
ENSG00000234982
ENSG00000171456
ENSG00000235724
ENSG00000267731
ENSG00000259627
ENSG00000257576
ENSG00000212719
ENSG00000109184
ENSG00000214827
ENSG00000182993
ENSG00000158480
ENSG00000270427
ENSG00000205571
ENSG00000162385
ENSG00000092871
ENSG00000230629
ENSG00000169291
ENSG00000137831
ENSG00000168556
ENSG00000123933
ENSG00000162441
ENSG00000177993
ENSG00000143375
ENSG00000100503
ENSG00000253872
ENSG00000232818
ENSG00000272983
ENSG00000188994
ENSG00000005206
ENSG00000107669
ENSG00000122042
ENSG00000132879
ENSG00000054277
ENSG00000169379
ENSG00000232259
ENSG00000261578
ENSG00000146918
ENSG00000225462
ENSG00000159140
ENSG00000128590
ENSG00000101871
ENSG00000205318
ENSG00000108588
ENSG00000260646
ENSG00000114391
ENSG00000196176
ENSG00000108395
ENSG00000235865
ENSG00000227400
ENSG00000106565
ENSG00000237172
ENSG00000162889
ENSG00000102575
ENSG00000102934
ENSG00000066455
ENSG00000147065
ENSG00000135480
ENSG00000170965
ENSG00000228002
ENSG00000143815
ENSG00000070423
ENSG00000170417
ENSG00000149328
ENSG00000106636
ENSG00000034152
ENSG00000260281
ENSG00000181495
ENSG00000164385
ENSG00000243725
ENSG00000139055
ENSG00000094963
ENSG00000114503
ENSG00000257715
ENSG00000198535
ENSG00000166347
ENSG00000214706
ENSG00000126778
ENSG00000076924
ENSG00000177082
ENSG00000122707
ENSG00000095539
ENSG00000114841
ENSG00000271771
ENSG00000249311
ENSG00000005175
ENSG00000163029
ENSG00000088854
ENSG00000110057
ENSG00000170561
ENSG00000212864
ENSG00000273035
ENSG00000237329
ENSG00000229017
ENSG00000168303
ENSG00000225484
ENSG00000227627
ENSG00000183255
ENSG00000143217
ENSG00000180209
ENSG00000227450
ENSG00000136560
ENSG00000234428
ENSG00000243770
ENSG00000169302
ENSG00000232803
ENSG00000185670
ENSG00000120833
ENSG00000102890
ENSG00000110711
ENSG00000267575
ENSG00000254560
ENSG00000173011
ENSG00000170953
ENSG00000254142
ENSG00000262879
ENSG00000204681
ENSG00000120662
ENSG00000145022
ENSG00000198231
ENSG00000265019
ENSG00000127481
ENSG00000230899
ENSG00000134851
ENSG00000273199
ENSG00000126457
ENSG00000123080
ENSG00000228412
ENSG00000187134
ENSG00000137185
ENSG00000170468
ENSG00000049883
ENSG00000147465
ENSG00000136531
ENSG00000173114
ENSG00000125850
ENSG00000166592
ENSG00000171163
ENSG00000186792
ENSG00000257489
ENSG00000243012
ENSG00000102010
ENSG00000225087
ENSG00000211817
ENSG00000167904
ENSG00000174748
ENSG00000251451
ENSG00000272842
ENSG00000124813
ENSG00000114388
ENSG00000249885
ENSG00000043355
ENSG00000213699
ENSG00000266935
ENSG00000151849
ENSG00000196644
ENSG00000258938
ENSG00000225760
ENSG00000272750
ENSG00000272752
ENSG00000064763
ENSG00000261455
ENSG00000224316
ENSG00000141934
ENSG00000173401
ENSG00000266964
ENSG00000112984
ENSG00000255010
ENSG00000224113
ENSG00000226053
ENSG00000227558
ENSG00000103326
ENSG00000226468
ENSG00000213901
ENSG00000032389
ENSG00000102554
ENSG00000095139
ENSG00000122477
ENSG00000182890
ENSG00000230753
ENSG00000136279
ENSG00000035687
ENSG00000263345
ENSG00000187801
ENSG00000169627
ENSG00000174444
ENSG00000272544
ENSG00000232098
ENSG00000040487
ENSG00000260100
ENSG00000269404
ENSG00000268051
ENSG00000259206
ENSG00000270015
ENSG00000138166
ENSG00000126581
ENSG00000261790
ENSG00000167523
ENSG00000224895
ENSG00000034693
ENSG00000107140
ENSG00000268310
ENSG00000185298
ENSG00000204130
ENSG00000256450
ENSG00000123983
ENSG00000154265
ENSG00000065357
ENSG00000167397
ENSG00000230815
ENSG00000213694
ENSG00000102970
ENSG00000156026
ENSG00000268355
ENSG00000157191
ENSG00000267855
ENSG00000260853
ENSG00000251675
ENSG00000269624
ENSG00000180818
ENSG00000178852
ENSG00000166387
ENSG00000099904
ENSG00000111674
ENSG00000117500
ENSG00000204463
ENSG00000158169
ENSG00000164124
ENSG00000151135
ENSG00000255372
ENSG00000136146
ENSG00000157890
ENSG00000034533
ENSG00000179295
ENSG00000225871
ENSG00000250015
ENSG00000087253
ENSG00000175827
ENSG00000100731
ENSG00000231131
ENSG00000169129
ENSG00000178460
ENSG00000202363
ENSG00000197980
ENSG00000171051
ENSG00000102053
ENSG00000025293
ENSG00000151748
ENSG00000223382
ENSG00000206053
ENSG00000213599
ENSG00000229563
ENSG00000019144
ENSG00000243147
ENSG00000123562
ENSG00000179981
ENSG00000227896
ENSG00000263155
ENSG00000120509
ENSG00000253816
ENSG00000271303
ENSG00000224189
ENSG00000236662
ENSG00000234925
ENSG00000225808
ENSG00000166002
ENSG00000179889
ENSG00000164830
ENSG00000143416
ENSG00000230368
ENSG00000105401
ENSG00000206530
ENSG00000135063
ENSG00000101213
ENSG00000206531
ENSG00000255594
ENSG00000224557
ENSG00000128606
ENSG00000251485
ENSG00000105327
ENSG00000136636
ENSG00000065923
ENSG00000200091
ENSG00000013364
ENSG00000173674
ENSG00000225111
ENSG00000205208
ENSG00000176273
ENSG00000256143
ENSG00000035681
ENSG00000131845
ENSG00000099282
ENSG00000117472
ENSG00000100142
ENSG00000223559
ENSG00000173295
ENSG00000111678
ENSG00000272656
ENSG00000204348
ENSG00000171984
ENSG00000267793
ENSG00000162073
ENSG00000253854
ENSG00000236155
ENSG00000058056
ENSG00000137975
ENSG00000099810
ENSG00000164615
ENSG00000256742
ENSG00000108582
ENSG00000151746
ENSG00000154035
ENSG00000225673
ENSG00000272600
ENSG00000267185
ENSG00000129351
ENSG00000126814
ENSG00000139668
ENSG00000215217
ENSG00000100324
ENSG00000127463
ENSG00000002933
ENSG00000152128
ENSG00000204435
ENSG00000268220
ENSG00000172292
ENSG00000163634
ENSG00000120314
ENSG00000146477
ENSG00000187676
ENSG00000187870
ENSG00000138029
ENSG00000002746
ENSG00000100100
ENSG00000176635
ENSG00000162413
ENSG00000138039
ENSG00000239521
ENSG00000176619
ENSG00000108010
ENSG00000198680
ENSG00000149532
ENSG00000113811
ENSG00000244490
ENSG00000233889
ENSG00000170860
ENSG00000271270
ENSG00000268870
ENSG00000244234
ENSG00000238754
ENSG00000176871
ENSG00000167186
ENSG00000258204
ENSG00000242853
ENSG00000254431
[truncated: 21,625 more rows]

## Sheet: Sheet3
ABCC8
ABCC8
ADCYAP1
ANO5
ANXA2
ANXA2
ANXA4
ANXA4
ARRDC3
BAG4
BMP5
BTG2
C10orf10
C3
CD24
CD24
CD44
CD44
CD44
CD99L2
CDKN1C
CELA3A
CELA3B
CFB
CHGA
CHGB
CHGB
CLPS
COMMD3
CPA1
CPA2
CPB1
CPE
CPNE8
CRYBA2
CRYBA2
CTRB1
CTRB2
CTRC
DDAH1
DDAH1
DDIT3
DEPP1
DLK1
EDEM1
EFNA5
EFNA5
ENPP2
ENPP2
FABP5
FAP
FAP
FAP
FGF12
FICD
FXYD2
FXYD5
G6PC2
G6PC2
G6PC2
GATM
GC
GC
GC
GC
GCG
GCG
GCG
GCG
GP2
GPX3
GPX3
GPX3
GPX3
HADH
HADH
HADH
HEPACAM2
IAPP
IAPP
IAPP
ID2
IFI30
IFITM3
INS
INS
INS
INS
INS-IGF2
LCN2
LDHA
LDHA
LDHA
LDHB
LOC100128906
LOXL4
MMP7
MRPL27
MT1F
MT1X
MT2A
NEUROD1
NFIB
NPY
NUDT19
PAM
PAPPA2
PARP9
PAX6
PCP4
PCSK1
PCSK1
PCSK2
PCSK2
PDK4
PDK4
PDK4
PDK4
PFKFB2
PFKFB2
PFKFB2
PIGR
PLA2G1B
PLK2
PNLIP
PON2
PPM1H
PPY
PRSS1
PRSS1
PRSS3
PRUNE2
PSME2
PTPRN
QPCT
RBP4
RBP4
REG1A
REG1A
REG1B
RELL1
RGS2
RGS2
RGS4
RGS4
RGS4
RP11-770J1.5
RPS4Y1
RPS4Y1
RRAGD
SAT1
SCG2
SCG2
SCG3
SCG3
SCG5
SCG5
SCGB2A1
SCGN
SCGN
SERPINA1
SERPINA1
SERPINA1
SERPINA1
SERPINA3
SERPINA3
SLC30A8
SLC30A8
SLC39A11
SLC7A8
SMIM24
SOX4
SOX4
SPINK1
SPINK1
SPP1
SPP1
SST
TACSTD2
TFPI
TM4SF1
TM4SF1
TM4SF4
TM4SF4
TM4SF4
TM4SF4
TMEM176B
TMEM208
TMEM60
TRY6
TSIX
TSPAN7
TTR
TTR
TTR
TXLNA
UCHL1
VPS25
XIST
XIST
