# Supplementary material for: Single-Cell RNA Sequencing-Based Computational Analysis to Describe Disease Heterogeneity
Source: Front Genet. 2019 Jul 12;10:629. doi: 10.3389/fgene.2019.00629 (PMC6640157; doi:10.3389/fgene.2019.00629)
Supplement: Supp 3 — Quantitative measurement of PCA and tSNE. [file Table_3.docx]

Quantitative measurement of PCA and t-SNE

|  | GSE69405 | GSE73121 | GSE81608 | GSE83139 |
| --- | --- | --- | --- | --- |
| PCA | 0.28 | 1.67 | 4.75 | 6.79 |
| t-SNE | 0.20 | 0.90 | 1.44 | 4.11 |

Here we used Davies-Bouldin index (DBI) to measure the performance of PCA and t-SNE, which is calculated as

where the *N* points (or cells) *X*1, *X*2 … *XN* are classified into *M* groups Ω1, Ω2 … Ω*M*, and the centroid of each group is *A*1, *A*2 … *AM* respectively, |Ω*i*| represents the number of points in Ω*i*, ||·|| represents Euclidean distance. **As DBI is defined as the ratio of the within cluster scatter to the between cluster separation, lower value of DBI means that the clustering is better.**
